# Supplementary material for: E-Liquid Flavor Preferences and Individual Factors Related to Vaping: A Survey among Dutch Never-Users, Smokers, Dual Users, and Exclusive Vapers
Source: Int J Environ Res Public Health. 2019 Nov 22;16(23):4661. doi: 10.3390/ijerph16234661 (PMC6926905; doi:10.3390/ijerph16234661)
Supplement: Supplementary file 1 [file ijerph-16-04661-s001.pdf]

# E-liquid flavor preferences and individual factors related to vaping: a survey among Dutch never-users, smokers, dual users, and exclusive vapers

Kim AGJ Romijnders<sup>1,2\*</sup>, Erna JZ Krüsemann<sup>1,3</sup>, Sanne Boesveldt<sup>3</sup>, Kees de Graaf<sup>3</sup>, Hein de Vries<sup>2</sup> and Reinskje Talhout<sup>1</sup>

<sup>1</sup> Centre for Health Protection, National Institute for Public Health and the Environment (RIVM), Antonie van Leeuwenhoeklaan 9, 3721 MA Bilthoven, the Netherlands; kim.romijnders@rivm.nl (K.A.G.J.R.); erna.krusemann@rivm.nl (E.J.Z.K.); reinskje.talhout@rivm.nl (R.T.).

<sup>2</sup> Department of Health Promotion, School for Public Health and Primary Care (CAPHRI), Maastricht University, Universiteitssingel 40, 6229 ER Maastricht, the Netherlands; hein.devries@maastrichtuniversity.nl (H.d.V.).

<sup>3</sup> Division of Human Nutrition and Health, Wageningen University, Stippeneng 4, 6708 WE Wageningen, the Netherlands; sanne.boesveldt@wur.nl (S.B.); kees.degraaf@wur.nl (K.d.G.).

\* Correspondence: kim.romijnders@rivm.nl; Tel.: +31-30-274-4512

## Table of Contents

|                                                                                                                                        |    |
|----------------------------------------------------------------------------------------------------------------------------------------|----|
| Appendix A .....                                                                                                                       | 2  |
| Table A1: Overview of the included measures to determine user group, demographics, and attractiveness of product characteristics ..... | 2  |
| Table A2: Overview of the included measures regarding flavor preferences .....                                                         | 4  |
| Table A3: Overview of the included measures regarding individual factors related to vaping .....                                       | 6  |
| References .....                                                                                                                       | 11 |

## Appendix A

**Table A.1.** Overview of the included measures to determine user group, demographics, and attractiveness of product characteristics.

| Concept      | Item                       | Answer option                                                                                                                                                                                                                        | Explanation of the concept                                                                                                                                                                                                                                                                                                              | Reference                                                                                                 |
|--------------|----------------------------|--------------------------------------------------------------------------------------------------------------------------------------------------------------------------------------------------------------------------------------|-----------------------------------------------------------------------------------------------------------------------------------------------------------------------------------------------------------------------------------------------------------------------------------------------------------------------------------------|-----------------------------------------------------------------------------------------------------------|
| Type of user | A. I smoke or vape         | 1. Both cigarettes and E-cigarettes<br>2. Only cigarettes<br>3. Only E-cigarettes<br>4. I do not smoke or vape<br>5. I have smoked in the past<br>6. I have vaped in the past<br>I have smoked both cigarettes and vaped in the past | <ul style="list-style-type: none"> <li>• Response options A.4 formed the group never-users.</li> <li>• Response options A.2 &amp; B.1 OR B.2 formed smokers.</li> <li>• Response options A.1 &amp; (B.1 OR B.2) &amp; C1.OR C2) formed dual users.</li> <li>• Response options A.3 &amp; C1 OR C.2 formed E-cigarette users.</li> </ul> | Pearson, Hitchman (1)<br>Amato, Boyle (2),<br>International Tobacco Control Policy Evaluation Project (3) |
|              | B. How often do you smoke? | 1. Every day<br>2. Not every day, but at least once a week<br>3. Not every week, but at least once a month<br>Less than monthly                                                                                                      |                                                                                                                                                                                                                                                                                                                                         |                                                                                                           |
|              | C. How often do you vape?  | 1. Every day<br>2. Not every day, but at least once a week<br>3. Not every week, but at least once a month<br>4. Less than monthly<br>I have never vaped regularly, I only tried it once or twice.                                   |                                                                                                                                                                                                                                                                                                                                         |                                                                                                           |
| Demographics | How old are you?           | Open question                                                                                                                                                                                                                        |                                                                                                                                                                                                                                                                                                                                         | Centraal Bureau voor Statistiek (CBS) (4)                                                                 |
|              | What is your gender?       | Male-female                                                                                                                                                                                                                          |                                                                                                                                                                                                                                                                                                                                         |                                                                                                           |

|                                       |                                                                           |                                                                                                                                                                                                                                                                                                                                                                                                                                                    |                                                                                                                                                                          |                                                       |
|---------------------------------------|---------------------------------------------------------------------------|----------------------------------------------------------------------------------------------------------------------------------------------------------------------------------------------------------------------------------------------------------------------------------------------------------------------------------------------------------------------------------------------------------------------------------------------------|--------------------------------------------------------------------------------------------------------------------------------------------------------------------------|-------------------------------------------------------|
|                                       | What is your level of education?                                          | 1. Did not finish school<br>2. Primary school to 8th grade<br>3. Some high school, did not graduate<br>4. High school graduate, diploma or the equivalent (for example: GED)<br>5. Some college credit, no degree<br>6. Trade/technical/vocational training<br>7. Associate degree<br>8. Bachelor's degree<br>9. Master's degree<br>10. Professional degree<br>11. Doctorate degree                                                                | Low level of education:<br>answer options 1, 2, 3, 4<br><br>Middle level of education:<br>answer options 5, 6<br><br>Higher level of education:<br>answer options 7 - 11 |                                                       |
| <b>Attractiveness of e-cigarettes</b> | <i>The e-cigarette/vaper is attractive because (check all that apply)</i> | <u>The product looks nice</u><br><u>Due to all the different flavors</u><br>Because it is possible to alter the setting of the E-cigarette to my wishes<br><u>Due to its varying designs</u><br><u>Due to the price of the product</u><br><u>Due to the price of the E-liquids</u><br>Because the nicotine level can be varied<br>Because you can blow nice smoke clouds with it<br>Not applicable, I do not find the E-cigarette/vaper attractive | Single item                                                                                                                                                              | Romijnders, van Osch (5),<br>Romijnders, van Osch (6) |

**Table A.2.** Overview of the included measures regarding flavor preferences.

| Concept                                                      | Item                                                                                                           | Answer options                                                                                                                                                                                                                                                                                                                                                                                                                                                 | Explanation and formation of the concept                                                                                                                                                                                                                                                                                                                                                                                                                                                                                                                                                                                                                                                                                                                                                                                                                                                                 |                      |
|--------------------------------------------------------------|----------------------------------------------------------------------------------------------------------------|----------------------------------------------------------------------------------------------------------------------------------------------------------------------------------------------------------------------------------------------------------------------------------------------------------------------------------------------------------------------------------------------------------------------------------------------------------------|----------------------------------------------------------------------------------------------------------------------------------------------------------------------------------------------------------------------------------------------------------------------------------------------------------------------------------------------------------------------------------------------------------------------------------------------------------------------------------------------------------------------------------------------------------------------------------------------------------------------------------------------------------------------------------------------------------------------------------------------------------------------------------------------------------------------------------------------------------------------------------------------------------|----------------------|
| <b>Flavor preference of never-users and smokers</b>          | If you were to start using an e-cigarette, which flavor would you like to try? ( <i>check all that apply</i> ) | <ul style="list-style-type: none"> <li>▸ Tobacco</li> <li>▸ Menthol/mint</li> <li>▸ Nuts</li> <li>▸ Herbs, spices</li> <li>▸ Coffee/tea</li> <li>▸ Cocktails</li> <li>▸ Alcohol, other</li> <li>▸ Sodas</li> <li>▸ Sweet, chocolate</li> <li>▸ Sweet, vanilla</li> <li>▸ Sweets, other</li> <li>▸ Fruit</li> <li>▸ Sweet, desserts</li> <li>▸ Milk products</li> <li>▸ Candy</li> <li>▸ Floral</li> <li>▸ Unflavored</li> <li>▸ None of the flavors</li> </ul> | <p>For never-users and smokers: if participants selected ‘None of the flavors’, no other flavor category could be selected simultaneously.</p> <p>These closed answer options were recoded to the thirteen main categories of the recently published e-liquid flavor wheel (7), with the exception of “I don’t want to try a flavor”. Recoding reported flavor preferences resulted in the following thirteen main categories: <i>tobacco</i> (survey item: tobacco), <i>menthol/mint</i> (survey item: menthol/mint), <i>nuts</i> (survey item: nuts), <i>spices</i> (survey items: herbs, spices), <i>coffee/tea</i> (survey items: coffee; tea), <i>alcohol</i> (survey items: alcohol, cocktail; alcohol, other), <i>other beverages</i> (survey items: soda; sweet, other), <i>fruit</i> (survey item: fruit), <i>dessert</i> (survey items: sweet, dessert; milk product), <i>other sweets</i></p> | Yingst, Veldheer (8) |
| <b>Flavor preference of dual users and e-cigarette users</b> | Which e-liquid flavor did you try first?                                                                       | <ul style="list-style-type: none"> <li>▸ Tobacco</li> <li>▸ Menthol/mint</li> <li>▸ Nuts</li> <li>▸ Herbs, spices</li> <li>▸ Coffee/tea</li> <li>▸ Cocktails</li> <li>▸ Alcohol, other</li> <li>▸ Sodas</li> <li>▸ Sweet, chocolate</li> <li>▸ Sweet, vanilla</li> </ul>                                                                                                                                                                                       |                                                                                                                                                                                                                                                                                                                                                                                                                                                                                                                                                                                                                                                                                                                                                                                                                                                                                                          |                      |

|                                                  |                                                                                                                                                                                                                                                                                                                                                                                                                                 |                                                                                                                                                                                                                                                                                                                                                                                                                                                                                                                                                                                                                               |
|--------------------------------------------------|---------------------------------------------------------------------------------------------------------------------------------------------------------------------------------------------------------------------------------------------------------------------------------------------------------------------------------------------------------------------------------------------------------------------------------|-------------------------------------------------------------------------------------------------------------------------------------------------------------------------------------------------------------------------------------------------------------------------------------------------------------------------------------------------------------------------------------------------------------------------------------------------------------------------------------------------------------------------------------------------------------------------------------------------------------------------------|
|                                                  | <ul style="list-style-type: none"> <li>▸ Sweets, other</li> <li>▸ Fruit</li> <li>▸ Sweet, desserts</li> <li>▸ Milk products</li> <li>▸ Candy</li> <li>▸ Floral</li> <li>▸ Unflavored</li> </ul>                                                                                                                                                                                                                                 | (survey items: sweet, chocolate; sweet, vanilla), <i>candy</i> (survey items: sweet, candy), <i>other flavors</i> (survey items: floral; other) and <i>unflavored</i> (survey item: unflavored). For example, if a never-user or smoker reported an interest in the survey items “sweet, candy” and “alcohol, cocktail”, their answers were recoded as a preference for the categories candy and alcohol, respectively. Open answers from dual and e-cigarette users were assessed by two authors (KR and EK) to support recoding of their closed answers in accordance with the categories of the e-liquid flavor wheel (7). |
| Which e-liquid flavor do you currently use most? | <ul style="list-style-type: none"> <li>▸ Tobacco</li> <li>▸ Menthol/mint</li> <li>▸ Nuts</li> <li>▸ Herbs, spices</li> <li>▸ Coffee/tea</li> <li>▸ Cocktails</li> <li>▸ Alcohol, other</li> <li>▸ Sodas</li> <li>▸ Sweet, chocolate</li> <li>▸ Sweet, vanilla</li> <li>▸ Sweets, other</li> <li>▸ Fruit</li> <li>▸ Sweet, desserts</li> <li>▸ Milk products</li> <li>▸ Candy</li> <li>▸ Floral</li> <li>▸ Unflavored</li> </ul> |                                                                                                                                                                                                                                                                                                                                                                                                                                                                                                                                                                                                                               |

**Table A.3.** Overview of the included measures regarding individual factors related to vaping.

| Concept                                                        | Item                                                                                                                                                   | Answer option                | Explanation of the scale                                             | Formation of the concept                                                                                                                                                                                                                                                                                                                                                                                                                                                                  | Cronbach's alpha ( $\alpha$ ) | Reference                |
|----------------------------------------------------------------|--------------------------------------------------------------------------------------------------------------------------------------------------------|------------------------------|----------------------------------------------------------------------|-------------------------------------------------------------------------------------------------------------------------------------------------------------------------------------------------------------------------------------------------------------------------------------------------------------------------------------------------------------------------------------------------------------------------------------------------------------------------------------------|-------------------------------|--------------------------|
| <b>Knowledge about tobacco product use and e-cigarette use</b> | 1. The E-cigarette/vaper is 95% less damaging than a cigarette.                                                                                        | 0 = incorrect<br>1 = correct | 0 = no correct answers to 9 = all statements were answered correctly | <ul style="list-style-type: none"> <li>- 0 = no correct answers to 12 = all statements were answered correctly.</li> <li>- The scores were summed to come to a final score of possible correct answers out of 12.</li> <li>- <i>I don't know</i> was categorized as incorrect.</li> <li>- The coding of correct and incorrect answers was based on scientific consensus.</li> <li>- The statements assessing knowledge were based on previously conducted a focus group study.</li> </ul> | NA                            | Romijnders, van Osch (6) |
|                                                                | 2. Only water vapor comes out of an E-cigarette/vaper.                                                                                                 | NA = don't know              |                                                                      |                                                                                                                                                                                                                                                                                                                                                                                                                                                                                           |                               |                          |
|                                                                | 3. E-cigarettes/vapers are the same thing.                                                                                                             |                              |                                                                      |                                                                                                                                                                                                                                                                                                                                                                                                                                                                                           |                               |                          |
|                                                                | 4. E-cigarette use can lead to irritation and damage of the airways, palpitations and an increased risk of cancer.                                     |                              |                                                                      |                                                                                                                                                                                                                                                                                                                                                                                                                                                                                           |                               |                          |
|                                                                | 5. The E-cigarette/vaper is a scientifically proved means of stopping smoking.                                                                         |                              |                                                                      |                                                                                                                                                                                                                                                                                                                                                                                                                                                                                           |                               |                          |
|                                                                | 6. There are just as many harmful substances in the E-cigarette liquid as in a cigarette.                                                              |                              |                                                                      |                                                                                                                                                                                                                                                                                                                                                                                                                                                                                           |                               |                          |
|                                                                | 7. Smoking increase the risk of developing various diseases, including lung cancer and various other types of cancer, cardiovascular disease and COPD. |                              |                                                                      |                                                                                                                                                                                                                                                                                                                                                                                                                                                                                           |                               |                          |
|                                                                | 8. Additives (substances added to the tobacco in a cigarette) cannot make cigarette smoke any more addictive.                                          |                              |                                                                      |                                                                                                                                                                                                                                                                                                                                                                                                                                                                                           |                               |                          |
|                                                                | 9. Smoking is the main cause of premature death.                                                                                                       |                              |                                                                      |                                                                                                                                                                                                                                                                                                                                                                                                                                                                                           |                               |                          |
|                                                                | 10. It is always good to stop smoking, even for a short time.                                                                                          |                              |                                                                      |                                                                                                                                                                                                                                                                                                                                                                                                                                                                                           |                               |                          |
|                                                                | 11. Passive smoking is also damaging.                                                                                                                  |                              |                                                                      |                                                                                                                                                                                                                                                                                                                                                                                                                                                                                           |                               |                          |

|                                                                               |                                                                                                  |                                                                                   |                                                                                                    |                                                                                                                                    |       |                        |
|-------------------------------------------------------------------------------|--------------------------------------------------------------------------------------------------|-----------------------------------------------------------------------------------|----------------------------------------------------------------------------------------------------|------------------------------------------------------------------------------------------------------------------------------------|-------|------------------------|
| 12. Getting enough exercise compensates for the risks to health from smoking. |                                                                                                  |                                                                                   |                                                                                                    |                                                                                                                                    |       |                        |
| Attitude towards e-cigarettes                                                 | I think vaping is...                                                                             |                                                                                   | 1= very negative towards e-cigarette use to 7 = very positive towards e-cigarette use.             | The four items were summed and averaged to compute one score of the concept Attitude towards e-cigarettes.                         | 0.927 | Lehmann, de Melker (9) |
|                                                                               | really bad - really good (1-7)                                                                   |                                                                                   |                                                                                                    |                                                                                                                                    |       |                        |
|                                                                               | really harmful - really safe (1-7)                                                               |                                                                                   |                                                                                                    |                                                                                                                                    |       |                        |
|                                                                               | really gross - really nice (1-7)                                                                 |                                                                                   |                                                                                                    |                                                                                                                                    |       |                        |
|                                                                               | really socially unacceptable behavior - really socially acceptable behavior (1-7)                |                                                                                   |                                                                                                    |                                                                                                                                    |       |                        |
| Deliberation on the pros and cons of e-cigarette use                          | Please keep your own decision in mind, but have you considered the option of using e-cigarettes? |                                                                                   | 1 = no deliberation about e-cigarette use to 7 = very extensive deliberation about e-cigarette use | The three items were summed and averaged to compute one score of the concept Deliberation on the pros and cons of e-cigarette use. | 0.656 | Lehmann, de Melker (9) |
|                                                                               | I have visualized how it would feel not to smoke and not to vape.                                | I have not visualized how I would feel - I have visualized how I would feel (1-7) |                                                                                                    |                                                                                                                                    |       |                        |

|                                                          |                                                                                                      |                                                                                       |                                                                                             |                                                                                                                                                                                                |    |                                                       |
|----------------------------------------------------------|------------------------------------------------------------------------------------------------------|---------------------------------------------------------------------------------------|---------------------------------------------------------------------------------------------|------------------------------------------------------------------------------------------------------------------------------------------------------------------------------------------------|----|-------------------------------------------------------|
|                                                          | I have visualized how it would feel to smoke.                                                        | I have not considered the consequences - I have considered the consequences (1-7)     |                                                                                             |                                                                                                                                                                                                |    |                                                       |
|                                                          | I have visualized how it would feel to vape.                                                         | no conscious list of the pros and cons - a very conscious list of pros and cons (1-7) |                                                                                             |                                                                                                                                                                                                |    |                                                       |
| <b>Perceived susceptibility about vaping (cognitive)</b> | A. If I vape, then my risk of developing some form of cancer during my lifetime is...                | very small - very big (1-7)                                                           | 1 = low to 7 = high perception of cognitive risk of health risks related to e-cigarette use | Answer options were recoded to make sure 7 is high and 1 is low.                                                                                                                               | NA | Janssen, van Osch (10)<br><br>de Vries, van Osch (11) |
|                                                          | B. I think that if I vape, my risk of developing some form of cancer during my lifetime is...        |                                                                                       |                                                                                             | Cognitive susceptibility and severity items on side-effects could not be summed [6] because Cronbach's alpha was below 0.6. A concept could not be created, so the individual items were used. |    |                                                       |
| <b>Perceived susceptibility about vaping (affective)</b> | C. My feeling is that if I vape, the risk of developing some form of cancer during my lifetime is... | very small - very big (1-7)                                                           | 1 = low to 7 = high affective risk perception for susceptibility to                         | Answer options were recoded to make sure 7 is high and 1 is low.                                                                                                                               | NA | Janssen, van Osch (10)<br><br>de Vries, van Osch (11) |

| health risks related to e-cigarette use. |                                                                                                                                            |                                              |                                                                                                                   |                                                                                       |       |                                                       |
|------------------------------------------|--------------------------------------------------------------------------------------------------------------------------------------------|----------------------------------------------|-------------------------------------------------------------------------------------------------------------------|---------------------------------------------------------------------------------------|-------|-------------------------------------------------------|
| <b>Severity of vaping</b>                | A. How bad would you feel if you developed a form of cancer during your lifetime?                                                          | very bad - not bad at all (1-7)              | 1 = low to 7 = high perception of severity of health risks                                                        | Answer options were recoded to make sure 7 is high and 1 is low.                      | 0.639 | Janssen, van Osch (10)<br><br>de Vries, van Osch (11) |
|                                          | B. If I should develop a form of cancer during my lifetime, then I would die of it.                                                        | completely agree - completely disagree (1-7) |                                                                                                                   | The four items were summed and averaged to compute one score of the concept Severity. |       |                                                       |
|                                          | C. If I should develop a form of cancer during my lifetime then this would influence my relationships (e.g. family friends or colleagues). |                                              |                                                                                                                   |                                                                                       |       |                                                       |
|                                          | D. If I should develop a form of cancer during my lifetime, then I am afraid that I will die of it.                                        |                                              |                                                                                                                   |                                                                                       |       |                                                       |
| <b>Trust in information</b>              | I think RIVM is trustworthy.                                                                                                               | completely agree - completely disagree (1-7) | 1 low to 7 = high level of trust in information provided by the Dutch National Institute of Public Health and the | The two items were summed and averaged to compute one score of the concept Trust.     | 0.915 | Siegrist, Earle (12)                                  |
|                                          | I think RIVM is independent.                                                                                                               |                                              |                                                                                                                   |                                                                                       |       |                                                       |

|                                  |                                                                                         |                                                                  |                                                                         |             |    |                                                       |
|----------------------------------|-----------------------------------------------------------------------------------------|------------------------------------------------------------------|-------------------------------------------------------------------------|-------------|----|-------------------------------------------------------|
| Environment<br>(RIVM).           |                                                                                         |                                                                  |                                                                         |             |    |                                                       |
| <b>Social influence</b>          | Society thinks that you should not vape e-cigarettes.                                   | completely agree<br>- completely disagree (1-7)                  |                                                                         | Single item | NA | Montano and Kasprzyk (13)                             |
| <b>Intention to start vaping</b> | Please indicate on a scale from 1 to 7 your intent to start vaping in the next 6 months | I do not intent to start vaping - I intent to start vaping (1-7) | 1 = low intention to start vaping to 7 = high intention to start vaping | Single item | NA | Montano and Kasprzyk (13)<br><br>Schoren, Hummel (14) |

## References

1. Pearson JL, Hitchman SC, Brose LS, Bauld L, Glasser AM, Villanti AC, et al. Recommended core items to assess e-cigarette use in population-based surveys. *Tob Control*. 2018;27(3):341-6.
2. Amato MS, Boyle RG, Levy D. How to define e-cigarette prevalence? Finding clues in the use frequency distribution. *Tob Control*. 2016;25(e1):e24-9.
3. International Tobacco Control Policy Evaluation Project. ITC Netherlands (NL11\_Pw) Waterloo, Canada: International Tobacco Control (ITC) Policy Evaluation Project.; 2017 [Available from: [https://www.itcproject.org/files/ITC\\_NL11\\_Replenishment\\_S\\_web\\_Eng\\_Dut.pdf](https://www.itcproject.org/files/ITC_NL11_Replenishment_S_web_Eng_Dut.pdf)].
4. Centraal Bureau voor Statistiek (CBS). International Standard Classification of Education (ISCED) [Dutch version]. Heerlen: Centraal Bureau voor Statistiek (CBS); 2018.
5. Romijnders K, van Osch L, de Vries H, Talhout R. Perceptions and Reasons Regarding E-Cigarette Use among Users and Non-Users: A Narrative Literature Review. *Int J Environ Res Public Health*. 2018;15(6).
6. Romijnders K, van Osch L, de Vries H, Talhout R. A Deliberate Choice? Exploring the Decision to Switch from Cigarettes to E-Cigarettes. *Int J Environ Res Public Health*. 2019;16(4).
7. Krusemann EJZ, Boesveldt S, de Graaf K, Talhout R. An E-liquid Flavor Wheel: A Shared Vocabulary based on Systematically Reviewing E-liquid Flavor Classifications in Literature. *Nicotine Tob Res*. 2018.
8. Yingst JM, Veldheer S, Hammett E, Hrabovsky S, Foulds J. A Method for Classifying User-Reported Electronic Cigarette Liquid Flavors. *Nicotine Tob Res*. 2017;19(11):1381-5.
9. Lehmann BA, de Melker HE, Timmermans DRM, Mollema L. Informed decision making in the context of childhood immunization. *Patient Educ Couns*. 2017;100(12):2339-45.
10. Janssen E, van Osch L, Lechner L, Candel M, de Vries H. Thinking versus feeling: differentiating between cognitive and affective components of perceived cancer risk. *Psychol Health*. 2012;27(7):767-83.
11. de Vries H, van Osch L, Eijmael K, Smerecnik C, Candel M. The role of risk perception in explaining parental sunscreen use. *Psychol Health*. 2012;27(11):1342-58.
12. Siegrist M, Earle TC, Gutscher H. Test of a trust and confidence model in the applied context of electromagnetic field (EMF) risks. *Risk Anal*. 2003;23(4):705-16.
13. Montano DE, Kasprzyk D. Theory of Reasoned Action, Theory of Planned Behavior, and the Integrated Behavioral Model. In: Glanz K, Rimer BK, Viswanath K, editors. *Health Behavior and Health Education: Theory, Research and Practice*. 4th ed. New Jersey: John Wiley & Sons; 2008. p. 67-96.
14. Schoren C, Hummel K, Vries H. Electronic cigarette use: comparing smokers, vapers, and dual users on characteristics and motivational factors. *Tobacco Prevention & Cessation* 2017.
